# Supplementary material for: Anopheles gambiae miRNAs as actors of defence reaction against Plasmodium invasion
Source: PubMed Central journal article supplement — Nucleic Acids Res. 2007 Oct 12;35(20):6953–62. doi: 10.1093/nar/gkm686 (PMC2175301; doi:10.1093/nar/gkm686), 2007-10-12
Supplement: nar_gkm686_2.pdf [file nar_gkm686_2.pdf]

**Table S1. list of primer sequences**

| Name          | Sequence                          | assays <sup>a</sup> |
|---------------|-----------------------------------|---------------------|
| let7asaval    | GGAACCACGGTACTATACAACC            | PE                  |
| miR-9basaval  | CATACAGCTAAAATCAC                 | PE                  |
| miR-12asaval  | GGATTTAAGGCACACCAGTACC            | PE                  |
| miR-34asaval  | AAACCACACAACCAGCTAACCAC           | PE                  |
| miR-79asaval  | ATGCTTTGGTAATCTA                  | PE                  |
| miR-125asaval | TCACAAGTTAGGGTCT                  | PE                  |
| miR-275asaval | GCCCAATAACGCGCGCTACTTC            | PE                  |
| miR-277asaval | TGTCGTACCAGATAGT                  | PE                  |
| miR-279asaval | TTAATGAGTGTGGATCT                 | PE                  |
| miR-281asaval | TGTACATAAAGAGAGCAATTC             | PE                  |
| miR-283asaval | TTGATAGCCTAGAATTACCAGC            | PE                  |
| miR-305asaval | CAGAGCACCTGATGAA                  | PE                  |
| miR-306asaval | CAACTGAGAGTCATCCAG                | PE                  |
| miR-317asaval | ACTGAGATACCACCAGA                 | PE                  |
| miR-451asaval | AACTCAGTAATGGTAAC                 | PE                  |
| miR-Fasaval   | AGACGAGCATGTAAT                   | PE, N               |
| miR-Gasaval   | TTAAGTCGGAGAAGTAG                 | PE, N               |
| miR-Iasaval   | GTACCACTACGTCAC                   | PE, N               |
| miR-Jasaval   | CATGGGTATGAAGTAGA                 | PE, N               |
| S7-A          | CACCGCCGTGTACGATGCCA              | Q                   |
| S7-B          | AATTCGAACGTAACGTCACGGC            | Q                   |
| ago1-A        | TGCCGGCCACACCGCCGGCACC GCC        | C                   |
| ago1-B        | GACCGGTGTGTAGGTCATGCTGGGC         | C                   |
| ago1-C        | CATGAGCGGACAATTACTCTCC            | Q                   |
| ago1-D        | GTATCTCGACGCCGGTAAAA              | Q                   |
| drosha-A      | TGATTGTGCACTTTGGTATTCG            | C                   |
| drosha-B      | GGATGCCACAGTTCGTTAGA              | C                   |
| drosha-C      | ACAGCTCCTGTCCGTGCTAT              | Q                   |
| drosha-D      | TCATCTCCTCAGCATGTCG               | Q                   |
| dcr1-A        | GACTAGCTGGAATTC AAGGATGCGGTTAAA   | C                   |
| dcr1-B        | TTCAGTTTCGATTATCAGCCAGATTTGAGCCAC | C                   |
| dcr1-C        | ATGCAAAGATCCCTGCTTGC              | Q                   |
| dcr1-D        | TCTTCATTTCCGTCCTCACC              | Q                   |

<sup>a</sup> PE stands for primer extension, N for northern blotting, C for the cloning of gene fragment, Q for quantitative real time PCR experiments.
