# Supplementary material for: Anopheles gambiae miRNAs as actors of defence reaction against Plasmodium invasion
Source: PubMed Central journal article supplement — Nucleic Acids Res. 2007 Oct 12;35(20):6953–62. doi: 10.1093/nar/gkm686 (PMC2175301; doi:10.1093/nar/gkm686), 2007-10-12
Supplement: nar_gkm686_3.pdf [file nar_gkm686_3.pdf]

**Table S2: Information on the *Anopheles* clusters analysed in this work**

| miRNA<br>Name | miRNA coordinates |          |          | Strand | Distance<br>(kb) | Hosting protein coding gene | Predicted <sup>a</sup> |
|---------------|-------------------|----------|----------|--------|------------------|-----------------------------|------------------------|
|               | Chromosome        | Start    | End      |        |                  |                             |                        |
| miR-281*      | 2L                | 17362447 | 17362467 | +      | 0                |                             | W, M                   |
| miR-J*        | 2R                | 9129644  | 9129665  | -      | 0                |                             |                        |
| miR-G*        | 2R                | 9129834  | 9129857  | -      | 0.17             |                             |                        |
| miR-34*       | 2R                | 28232721 | 28232740 | -      | 0                |                             | W                      |
| miR-277       | 2R                | 28234532 | 28234554 | -      | 1.8              |                             | W, M                   |
| miR-317       | 2R                | 28252007 | 28252031 | -      | 20.2             |                             | W, M                   |
| miR-12*       | 2R                | 37888125 | 37888147 | +      | 0                | <i>ENSANGG00000011107</i>   |                        |
| miR-283       | 2R                | 37890092 | 37890112 | +      | 2                | <i>ENSANGG00000011107</i>   | W, M                   |
| miR-F*        | 2R                | 55572844 | 55572865 | -      | 0                | <i>ENSANGG00000026438</i>   |                        |
| miR-279       | 2R                | 55573339 | 55573360 | -      | 0.5              | <i>ENSANGG00000026438</i>   | W, M                   |
| miR-I*        | 3L                | 2905485  | 2905505  | -      | 0                |                             |                        |
| miR-306*      | 3R                | 5888646  | 5888667  | -      | 0                | <i>ENSANGG00000008044</i>   |                        |
| miR-79        | 3R                | 5888312  | 5888333  | -      | 0.3              | <i>ENSANGG00000008044</i>   | W, M                   |
| miR-9b        | 3R                | 5887842  | 5887864  | -      | 0.7              | <i>ENSANGG00000008044</i>   | W, M                   |
| miR-9c        | 3R                | 5891223  | 5891244  | -      | 7.5              | <i>ENSANGG00000008044</i>   | W, M                   |
| let-7*        | 3R                | 10270762 | 10270783 | -      | 0                |                             | W, M                   |
| miR-125       | 3R                | 10270221 | 10270242 | -      | 0.5              |                             | W, M                   |
| miR-100       | 3R                | 10274733 | 10274754 | -      | 3.9              |                             | W, M                   |
| miR-275*      | 3R                | 38377402 | 38377423 | +      | 0                |                             | W, M                   |
| miR-305       | 3R                | 38386260 | 38386282 | +      | 8.8              |                             | W, M                   |

\* miRNA cloned in this study

<sup>a</sup> The miRNA has been predicted by Wang et al., 2005 (W) or in the miRBase (M)
