# Supplementary material for: Anopheles gambiae miRNAs as actors of defence reaction against Plasmodium invasion
Source: PubMed Central journal article supplement — Nucleic Acids Res. 2007 Oct 12;35(20):6953–62. doi: 10.1093/nar/gkm686 (PMC2175301; doi:10.1093/nar/gkm686), 2007-10-12
Supplement: nar_gkm686_4.pdf [file nar_gkm686_4.pdf]

Table S3. Information on the mouse miRNAs cloned in this study

| Organism           | Name         | Sequence                | Chro <sup>a</sup> | Location |          | Strand | Conservation <sup>b</sup> | References <sup>c</sup> |
|--------------------|--------------|-------------------------|-------------------|----------|----------|--------|---------------------------|-------------------------|
| <i>M. musculus</i> | mmu-miR-451  | AAACCGTTACCATTACTGAGTT  | 11                | 77889381 | 77889402 | +      | vertebrata                | 1,2,3,5                 |
|                    | mmu-let-7b   | TGAGGTAGTAGGTTGTGTGGTTT | 15                | 85535091 | 85535113 | -      | metazoa                   | 1,2,3                   |
|                    | mmu-mir-101b | ACAGTACTGTGATAGCTGAA    | 19                | 29201337 | 29201356 | +      | vertebrata                | 1,2,4                   |
|                    | mmu-mir-142  | GTAGTGTTTCCTACTTTATGA   | 11                | 87573099 | 87573118 | +      | vertebrata                | 1,2,3                   |
|                    | mmu-mir-A    | AATTCAATTCAGGGTAATCT    | 11                | 80531376 | 80531395 | +      | Hsa, Mmu, Rno             | 1                       |

<sup>a</sup> Chro stands for chromosome

<sup>b</sup> Hsa stands for *Homo sapiens*, mmu for *Mus musculus* and Rno for *Rattus norvegicus*

<sup>c</sup> 1, this work; 2, MirBase; 3, Lagos-Quintana et al., 2002; 4, Kim et al., 2004; 5, Sewer et al., 2005 and Altuvia et al., 2005
