# Supplementary figures and images for: Anopheles gambiae miRNAs as actors of defence reaction against Plasmodium invasion
Source: PubMed Central journal article supplement — Nucleic Acids Res. 2007 Oct 12;35(20):6953–62. doi: 10.1093/nar/gkm686 (PMC2175301; doi:10.1093/nar/gkm686), 2007-10-12

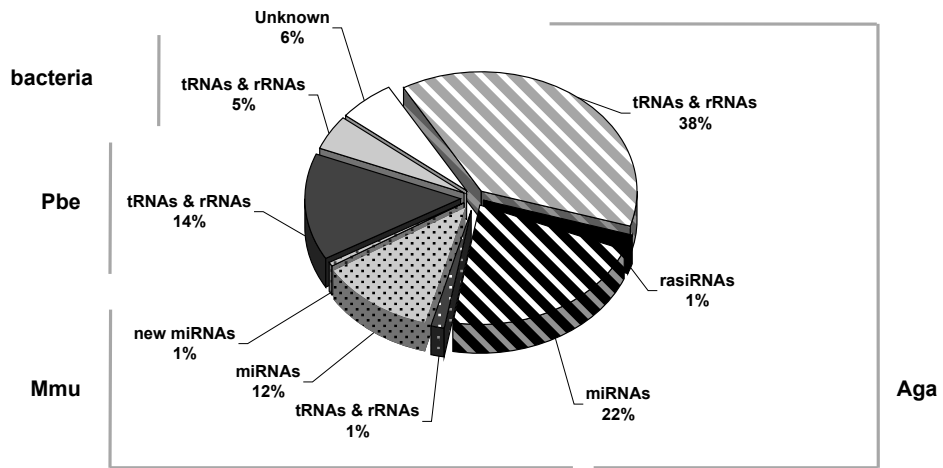

Figure S1

Supplement: nar_gkm686_1.pdf [file nar_gkm686_1.pdf]
